# Supplementary material for: Voluntary and Involuntary Admissions for Severe Mental Illness in China: A Systematic Review and Meta-Analysis
Source: Atypon-hosted journal article supplement (doi:10.1176/appi.ps.201900106), 2019-10-02
Supplement: appi.ps.201900106.ds001.pdf [file appi.ps.201900106.ds001.pdf]

**Online supplement**

**Search terms:**

("schizophrenic disorder" OR "disorder, schizophrenic" OR "schizophrenic disorders" OR "schizophrenia" OR "dementia praecox" OR "bipolar disorder" OR "bipolar depression" OR "manic depressive" OR "bipolar affective psychosis" OR "manic depression" OR "bipolar affective" OR "manic state" OR "mania" OR "manic" OR "manic disorder" OR "bipolar psychosis" OR "psychosis" OR "depression" OR "depressive" OR "depressed" OR "melancholia") AND ("Voluntary Admission" OR "Admission, Voluntary" OR "Admissions, Voluntary" OR "Voluntary Admissions") AND ("Chinese" OR "China").

Supplementary Figure. PRISMA flowchart

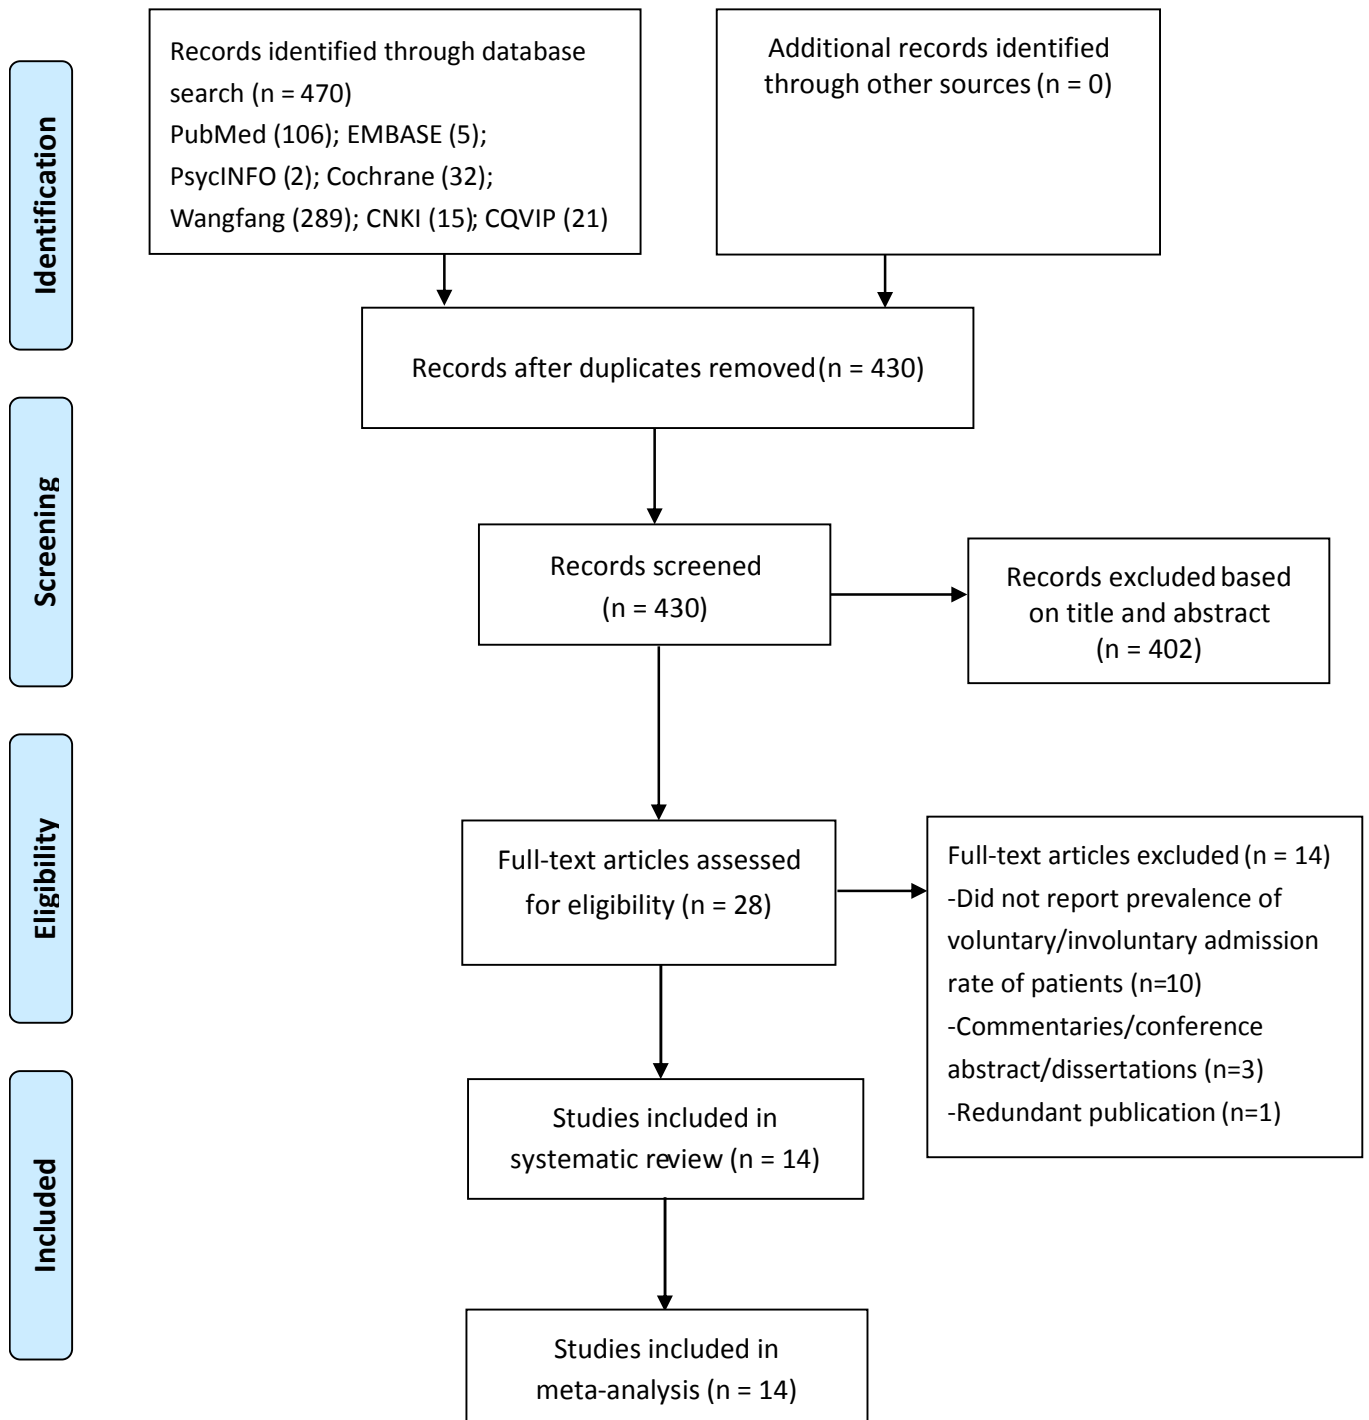

**Supplementary Figure. Voluntary admission rate for severe mental illness**

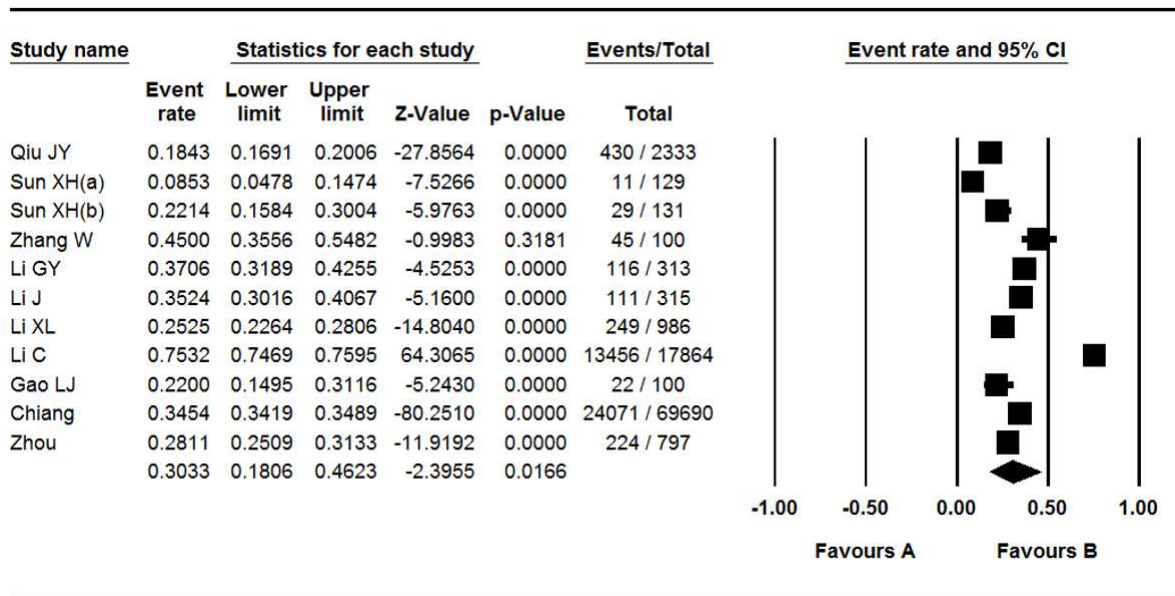

**Supplementary Figure. Involuntary admission rate for severe mental illness**

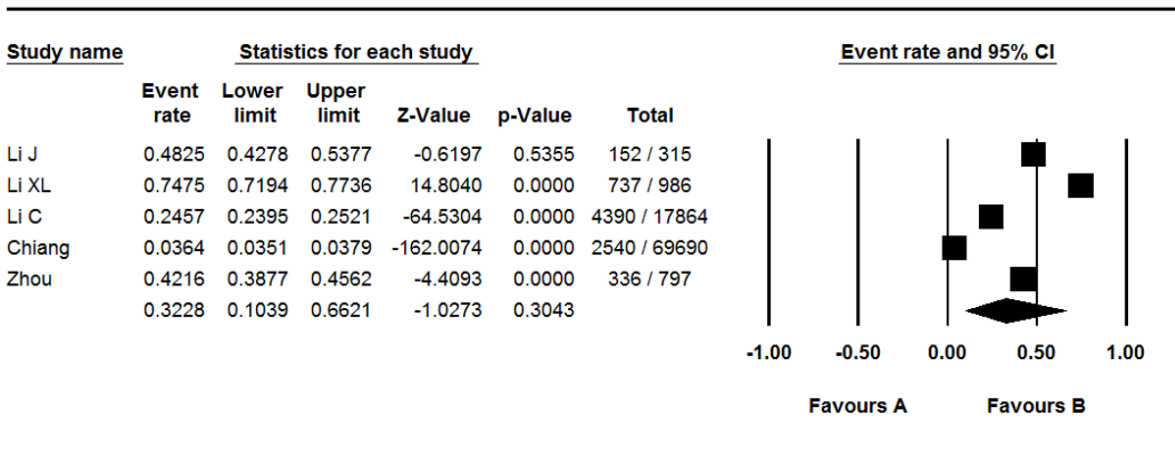

### Supplementary Figure. Voluntary admission rate for schizophrenia

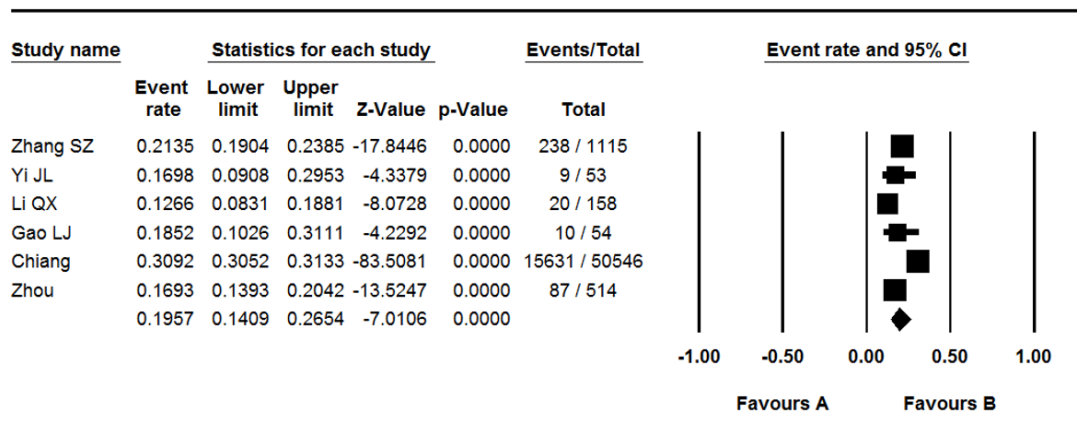

### Supplementary Figure. Involuntary admission rate for schizophrenia

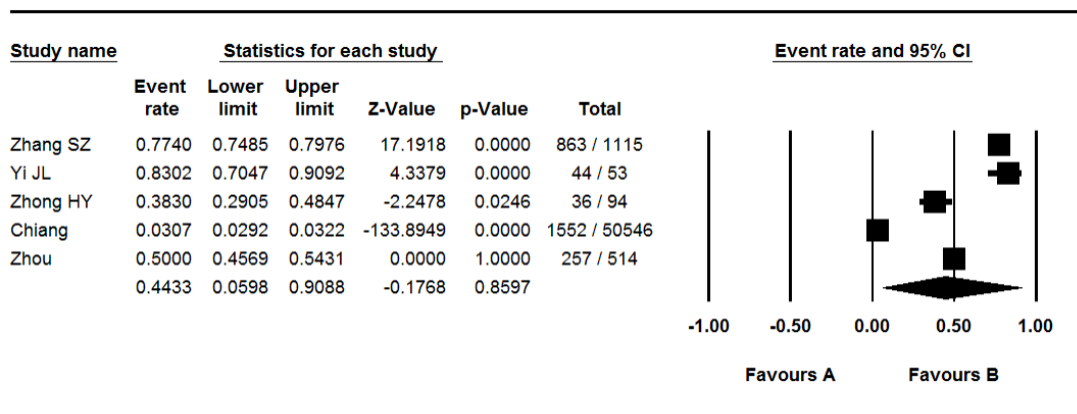

Supplementary Figure: Meta regression of survey year on voluntary rate in patients with severe mental illness

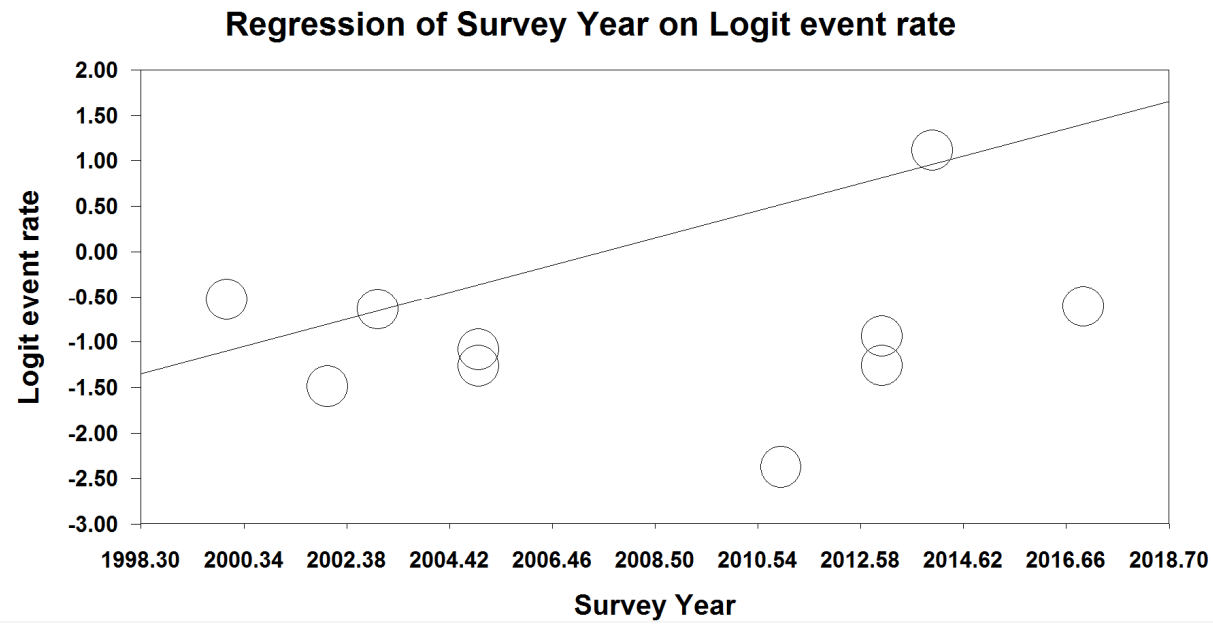

Note: Slope=0.15, Intercept=-295.52,  $P < 0.001$

Supplementary Figure: Meta regression of quality assessment score on voluntary rate in patients with severe mental illness

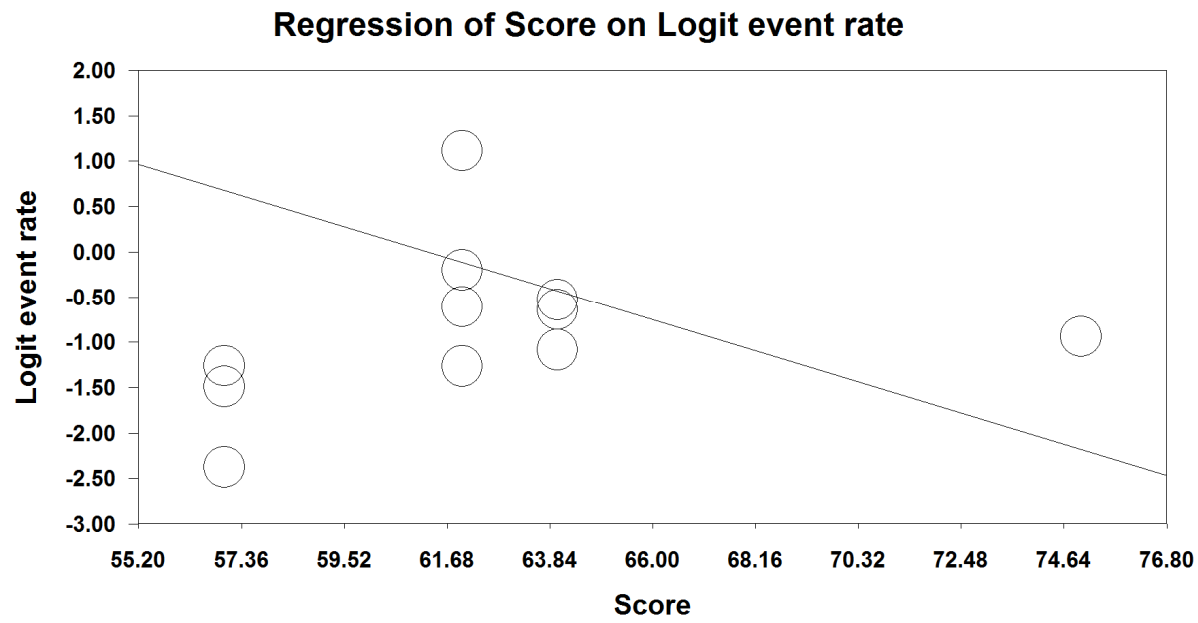

Note: Slope=-0.16, Intercept=9.76, P<0.001

**Supplementary Table. Characteristic of studies included in the meta-analysis**

| No. | First author        | Year | Design | Participants |             |       |             |                | Several mental illness |         |           | Schizophrenia |         |           | ref  | Quality |
|-----|---------------------|------|--------|--------------|-------------|-------|-------------|----------------|------------------------|---------|-----------|---------------|---------|-----------|------|---------|
|     |                     |      |        | N            | Hospital    | M%    | Age (M±SD)  | Effective rate | N                      | Vol (%) | Invol (%) | N             | Vol (%) | Invol (%) |      |         |
| 1   | Qiu JY              | 2004 | CS     | 2,333        | Psychiatric | 50.90 | 36.50±14    | NR             | 2,333                  | 18.43   | /         | /             | /       | /         | (1)  | 57      |
| 2   | Sun XH <sup>a</sup> | 2016 | CS     | 129          | Psychiatric | 45.00 | 38.54±12.71 | 92.14          | 129                    | 8.53    | /         | /             | /       | /         | (2)  | 57      |
| 2   | Sun XH <sup>b</sup> | 2016 | CS     | 131          | Psychiatric | 48.09 | 40.85±11.87 | 91.61          | 131                    | 22.14   | /         | /             | /       | /         | (2)  | 57      |
| 3   | Zhang W             | 2003 | CS     | 100          | General     | 47.00 | 34.58±13.4  | 78.1           | 100                    | 45      | /         | /             | /       | /         | (3)  | 62      |
| 4   | Zhang SZ            | 2016 | CS     | 1,115        | Psychiatric | 51.80 | 36.00±12    | 93.1           | /                      | /       | /         | 1,115         | 21.3    | 77.4      | (4)  | 64      |
| 5   | Yi JL               | 2015 | CS     | 53           | Psychiatric | 43.30 | 31.00±12    | 91.38          | /                      | /       | /         | 53            | 16.9    | 83        | (5)  | 61      |
| 6   | Li GY               | 2002 | CS     | 313          | General     | 50.50 | 34.47±13.21 | NR             | 313                    | 37      | /         | /             | /       | /         | (6)  | 64      |
| 7   | Li QX               | 2006 | CS     | 303          | Psychiatric | 52.15 | 34.47±13.21 | NR             | /                      | /       | /         | 158           | 12.7    | /         | (7)  | 62      |
| 8   | Li J                | 2017 | CS     | 315          | Mixed       | 47.62 | 39.80±11.55 | NR             | 315                    | 35.2    | 48.3      | /             | /       | /         | (8)  | 62      |
| 9   | Li XL               | 2006 | CS     | 986          | Psychiatric | 53.55 | 29.84±10.41 | NR             | 986                    | 25.3    | 74.7      | /             | /       | /         | (9)  | 64      |
| 10  | Li C                | 2018 | CS     | 17,846       | Psychiatric | 59.20 | 41.80±5.10  | NR             | 17,864                 | 75.4    | 24.6      | /             | /       | /         | (10) | 62      |
| 11  | Zhong HY            | 2014 | CS     | 94           | Psychiatric | 46.81 | 43.39±4.42  | NR             | /                      | /       | /         | 94            | /       | 38.3      | (11) | 59      |
| 12  | Gao LJ              | 2006 | CS     | 100          | Psychiatric | 48.00 | 34.40±9.80  | NR             | 100                    | 22      | /         | 54            | 18.5    | /         | (12) | 62      |
| 13  | Chiang              | 2017 | CS     | 69,690       | Mixed       | 55.90 | NR          | NR             | 69,690                 | 34.5    | 3.6       | 50,546        | 30.9    | 3.1       | (13) | 64      |
| 14  | Zhou                | 2015 | LT     | 797          | Mixed       | 52.00 | 36.40±13.10 | 98             | 797                    | 28.11   | 42.16     | 514           | 16.93   | 50        | (14) | 75      |

<sup>a</sup>Participants were recruited in 2011 (N=129), <sup>b</sup>Participants were recruited in 2013 (N=131). CS: cross-sectional, LT: longitudinal; M%: Percentage of male; Quality: Studies scoring above 67 were of high quality and those scoring between 50 and 66 were considered to be of moderated quality.

**Supplementary Table. Quality assessment of included studies**

| Study         | 1. Study question | 2. Study population | 3. Comparability of subjects | 4. Exposure /intervention | 5. Outcome measures | 6. Statistical Analysis | 7. Results | 8. Discussion | 9. Funding /sponsorship | Total | Quality  |
|---------------|-------------------|---------------------|------------------------------|---------------------------|---------------------|-------------------------|------------|---------------|-------------------------|-------|----------|
| Li GY 2002    | 2                 | 8                   | 14                           | 3                         | 10                  | 12                      | 5          | 5             | 5                       | 64    | moderate |
| Zhang W 2003  | 2                 | 8                   | 14                           | 3                         | 10                  | 10                      | 5          | 5             | 5                       | 62    | moderate |
| Qiu JY 2004   | 2                 | 8                   | 9                            | 3                         | 10                  | 10                      | 5          | 5             | 5                       | 57    | moderate |
| Gao LJ 2006   | 2                 | 8                   | 14                           | 3                         | 10                  | 10                      | 5          | 5             | 5                       | 62    | moderate |
| Li QX 2006    | 2                 | 8                   | 14                           | 3                         | 10                  | 10                      | 5          | 5             | 5                       | 62    | moderate |
| Li XL 2006    | 2                 | 8                   | 14                           | 3                         | 10                  | 12                      | 5          | 5             | 5                       | 64    | moderate |
| Zhong HY 2014 | 2                 | 5                   | 14                           | 3                         | 10                  | 10                      | 5          | 5             | 5                       | 59    | moderate |
| Yi JL 2015    | 2                 | 5                   | 14                           | 3                         | 10                  | 12                      | 5          | 5             | 5                       | 61    | moderate |
| Zhou 2015     | 2                 | 8                   | 17                           | 3                         | 15                  | 12                      | 8          | 5             | 5                       | 75    | High     |
| Sun XH 2016   | 2                 | 8                   | 9                            | 3                         | 10                  | 10                      | 5          | 5             | 5                       | 57    | moderate |
| Zhang SZ 2016 | 2                 | 8                   | 14                           | 3                         | 10                  | 12                      | 5          | 5             | 5                       | 64    | moderate |
| Chiang 2017   | 2                 | 8                   | 14                           | 3                         | 10                  | 12                      | 5          | 5             | 5                       | 64    | moderate |
| Li J 2017     | 2                 | 8                   | 14                           | 3                         | 10                  | 10                      | 5          | 5             | 5                       | 62    | moderate |
| Li C 2018     | 2                 | 8                   | 14                           | 3                         | 10                  | 10                      | 5          | 5             | 5                       | 62    | moderate |

Note: Studies scoring above 67 were defined to be of high quality and those scoring between 50 and 66 were considered to be of moderated quality



**Supplementary Table. Subgroup analyses of voluntary and involuntary admission rates for severe mental illness**

| Subgroups                    | Categories (Num of studies) | Proportion (%) | 95% CI |      | Events | Sample size | $I^2$ | $P$ (within subgroup) | $Q$ ( $P$ across subgroup) |
|------------------------------|-----------------------------|----------------|--------|------|--------|-------------|-------|-----------------------|----------------------------|
| <b>Voluntary admission</b>   |                             |                |        |      |        |             |       |                       |                            |
| <b>Study site</b>            | Multicenter (6)             | 37.4           | 19.0   | 60.4 | 38,408 | 91,312      | 99.9  | <0.001                | 1.59 (0.21)                |
|                              | Single site (5)             | 23.2           | 15.6   | 33.2 | 356    | 1,446       | 89.3  | <0.001                |                            |
| <b>Hospital type</b>         | Psychiatric (6)             | 25.9           | 8.1    | 58.2 | 14,197 | 21,543      | 99.8  | <0.001                | 0.34 (0.56)                |
|                              | General or mixed (5)        | 34.7           | 31.0   | 38.5 | 24,567 | 71,215      | 80.1  | <0.001                |                            |
| <b>Study time</b>            | Before law introduction (8) | 26.4           | 20.5   | 33.4 | 25,168 | 74,448      | 97.9  | <0.001                | 0.10 (0.76)                |
|                              | After law introduction (2)  | 28.7           | 17.6   | 43.2 | 140    | 446         | 86.2  | 0.007                 |                            |
| <b>Study Area</b>            | East (6)                    | 24.9           | 19.4   | 31.2 | 24,493 | 71,351      | 93.9  | <0.001                | 5.42 (0.02)                |
|                              | West (2)                    | 61.6           | 30.6   | 85.4 | 13,501 | 17,964      | 97.7  | <0.001                |                            |
| <b>Gender</b>                | Female (5)                  | 28.2           | 20.9   | 36.9 | 11,594 | 32,778      | 97.1  | <0.001                | 0.74 (0.39)                |
|                              | Male (5)                    | 23.1           | 15.9   | 32.4 | 13,402 | 41,128      | 97.7  | <0.001                |                            |
| <b>Publication</b>           | Chinese (9)                 | 30.0           | 13.1   | 54.8 | 14,469 | 22,271      | 99.8  | <0.001                | 0.02 (0.90)                |
| <b>Language</b>              | English (2)                 | 31.5           | 25.5   | 38.1 | 24,295 | 70,487      | 93.0  | <0.001                |                            |
| <b>Involuntary admission</b> |                             |                |        |      |        |             |       |                       |                            |
| <b>Study site</b>            | Multicenter (4)             | 23.2           | 6.4    | 57.1 | 7,418  | 88,666      | 99.9  | <0.001                | 9.00 (0.00)                |
|                              | Single site (1)             | 74.7           | 71.9   | 77.4 | 737    | 986         | -     | -                     |                            |
| <b>Hospital type</b>         | Psychiatric (2)             | 49.5           | 10.1   | 89.5 | 5,127  | 18,850      | 99.9  | <0.001                | 0.43 (0.47)                |
|                              | General or mixed (3)        | 22.8           | 2.6    | 76.4 | 3,028  | 70,802      | 99.9  | <0.001                |                            |
| <b>Study time</b>            | Before law introduction (3) | 48.3           | 42.8   | 53.8 | 3,613  | 71,702      | 99.9  | <0.001                | 26.3 (0.61)                |
|                              | After law introduction (1)  | 30.2           | 42.7   | 53.6 | 152    | 315         | -     | -                     |                            |
| <b>Study Area</b>            | East (3)                    | 32.0           | 1.9    | 92.1 | 3,429  | 71,220      | 99.9  | <0.001                | 0.05 (0.82)                |
|                              | West (1)                    | 24.6           | 23.9   | 25.2 | 4,390  | 17,864      | -     | -                     |                            |
| <b>Gender</b>                | Female (3)                  | 26.6           | 0.02   | 0.86 | 1,515  | 31,632      | 99.9  | <0.001                | 0.03 (0.88)                |
|                              | Male (3)                    | 33.6           | 0.02   | 0.91 | 2,098  | 39,941      | 99.9  | <0.001                |                            |
| <b>Publication</b>           | Chinese (3)                 | 49.1           | 17.1   | 0.82 | 5,279  | 19,165      | 99.8  | <0.001                | 1.10 (0.29)                |

---

|                 |             |      |      |      |       |        |      |        |
|-----------------|-------------|------|------|------|-------|--------|------|--------|
| <b>Language</b> | English (2) | 14.2 | 0.01 | 0.75 | 2,876 | 70,487 | 99.9 | <0.001 |
|-----------------|-------------|------|------|------|-------|--------|------|--------|

---

**Included studies:**

1. Qiu JY, et al.: An investigation on female in patients with mental disorders in China [In Chinese]. Shanghai Arch Psychiatry 16:343-6, 2004
2. Sun XH, et al.: Investigation on admission methods of patients in closed ward of psychiatric hospital [In Chinese]. Prev Med 28:1029-33, 2016
3. Zhang W, et al.: The Survey of Psychopath's Rights [In Chinese]. West China Medical Journal 18:42-3, 2003
4. Zhang SZ, et al.: Correlates of agitation in newly hospitalized patients with schizophrenia [In Chinese]. Chinese Mental Health Journal 30:881-5, 2016
5. Yi JL, et al.: Related factors to the competence of informed consent in new admitted patients with schizophrenia. [In Chinese]. Chinese Mental Health Journal 29:651-5, 2015
6. Li GY, et al.: A study of insight in relation to voluntary admission and voluntary treatment of persons with mental disorders. [In Chinese]. Chinese Journal of Behavioral Medical Science 11:1-4, 2002
7. Li QX, et al.: Admission Attitude and Insight in Patients with Mental Disorders. [In Chinese] Journal of Nursing Science 21:21-3, 2006
8. Li J, et al.: Preliminary study of application of Barriers to Access to Care Evaluation (BACE) (Chinese version) in patients with severe mental disorders [In Chinese]. Journal of Psychiatry 30:241-5, 2017
9. Li XL, et al.: The effect of schizophrenia patients and their families on their right of knowing and agreeing on the facts of hospitalization. [In Chinese]. Journal of Nursing 13:4-6, 2006
10. Li C, et al.: Epidemiological survey on emergency patients with severe mental illness in mental health specialized hospitals in Guangxi. [In Chinese]. Guangxi Medical Journal 40:1591-4, 2018
11. Zhong HY, et al.: Analysis of related factors of violent aggression in patients with schizophrenia. [In Chinese]. Medical Journal of Chinese People's Health 26:52-3, 2014
12. Gao LJ, et al.: Analysis of admission methods and related factors in patients with mental illness. [In Chinese]. Journal of Clinical Medicine in Practice 2:61-2, 2006
13. Chiang CL, Chen PC, Huang LY, et al.: Time trends in first admission rates for schizophrenia and other psychotic disorders in Taiwan, 1998-2007: a 10-year population-based cohort study. Soc Psychiatry Psychiatr Epidemiol 52:163-73, 2017
14. Zhou JS, Xiang YT, Zhu XM, et al.: Voluntary and involuntary psychiatric admissions in China. Psychiatric services (Washington, DC) 66:1341-6, 2015
